# Supplementary material for: Analysis of Differentially Expressed Genes and Signaling Pathways Related to Intramuscular Fat Deposition in Skeletal Muscle of Sex-Linked Dwarf Chickens
Source: Biomed Res Int. 2014 Mar 17;2014:724274. doi: 10.1155/2014/724274 (PMC3976829; doi:10.1155/2014/724274)
Supplement: Supplementary file 1 — Supplemental file 1. Sequences of primers used for qRT-PCR. Supplemental file 2. The mRNA differential profiles in skeletal muscles of 7-week-old dwarf and normal chickens. Supplemental file 3. Common Enriched GO terms among the differentially expressed genes in both dwarf and normal chickens. Supplemental file 4. The frequency of DEGs involved in biological process. [file 724274.f1.zip]

Archive with 4 entries (4 files):
- 724274.f1/Supplemental  file 1.docx
- 724274.f1/Supplemental  file 2.docx
- 724274.f1/Supplemental  file 3.docx
- 724274.f1/Supplemental  file 4.docx
